# Supplementary material
Source: Springer Nature journal article supplement (https://www.springermedizin.de/resource/supplementary/12913_2013_3740_MOESM1_ESM.pdf/9532248)
Supplement: MOESM1 [file 9532248]

**Survey distribution -  
Phase 1 (pre)**

**Survey distribution -  
Phase 2 (post)**

Surveys handed out  
(n=20)

Surveys handed out  
(n=20)

**Intervention: Observational Study**  
Evaluation of the Test-mate ChE bedside  
acetylcholinestase field kit in acute OP poisoning  
(13 months)

7 doctors

14 doctors didn't return the survey

7 doctors

26 surveys completed

3 doctors  
completed  
survey twice  
(Phase 1 & 2)

Phase 2 survey  
excluded from analysis

1 doctor didn't answer  
"No of AChE tests seen"

22 surveys for main analysis

"experience with AChE testing"

No previous  
AChE tests

1- 5 tests  
seen

5-20 tests  
seen
